# Supplementary material for: The Effects of Silver Sulfadiazine on Methicillin-Resistant Staphylococcus aureus Biofilms
Source: PubMed Central journal article supplement (PMC7600712; doi:10.3390/microorganisms8101551), 2020-10-08
Supplement: microorganisms-08-01551-s001.pdf [file microorganisms-08-01551-s001.pdf]

24h-BF chip preparation

BF chip exposure with compounds (24 h)

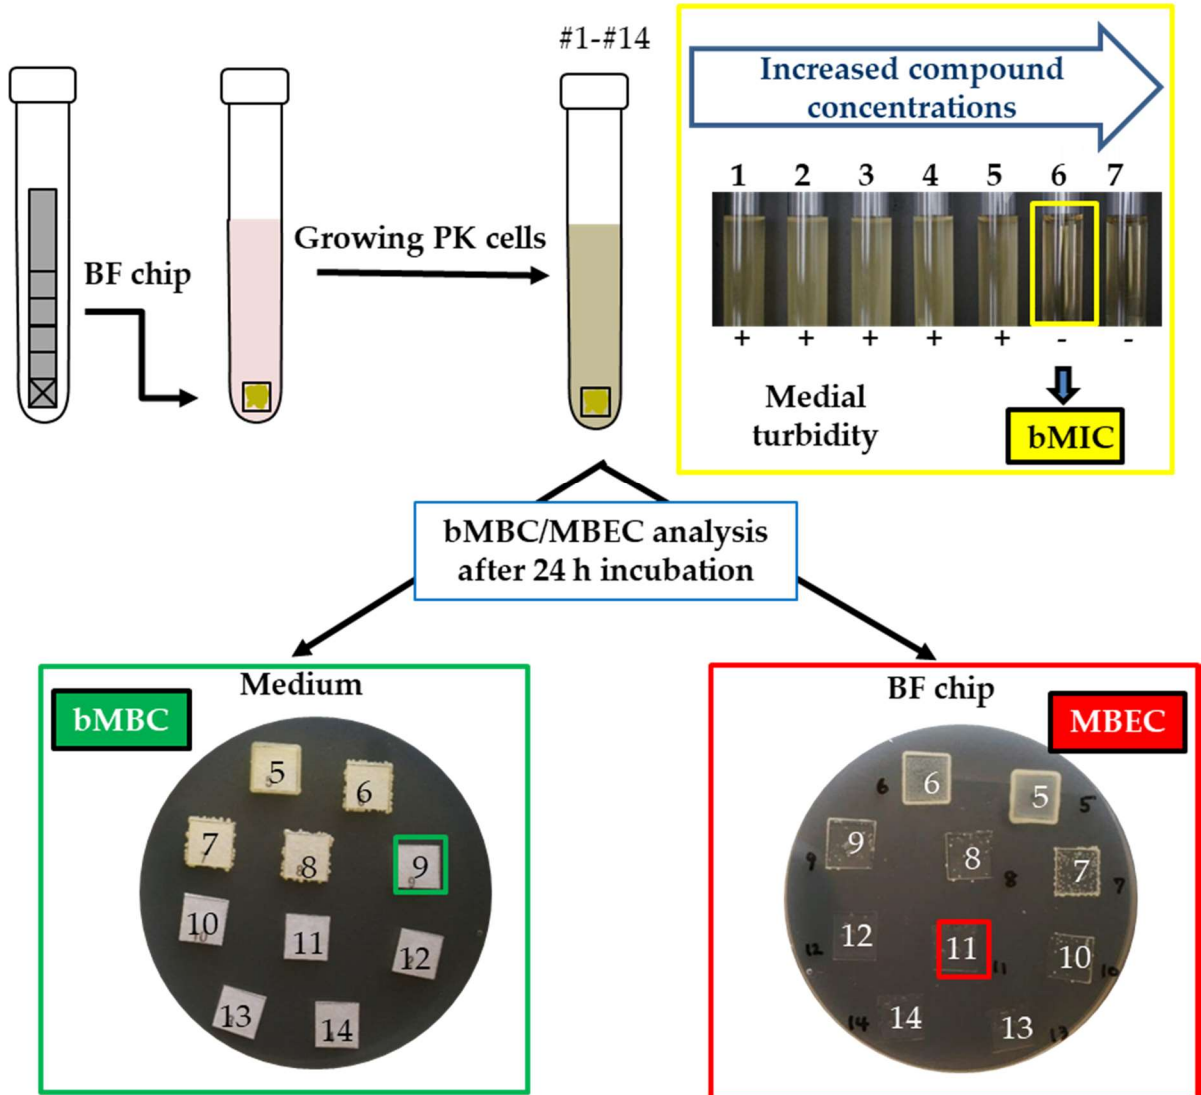

Figure S1. Summarized procedure of the BF chip method to determine bMIC, bMBC, and MBEC.

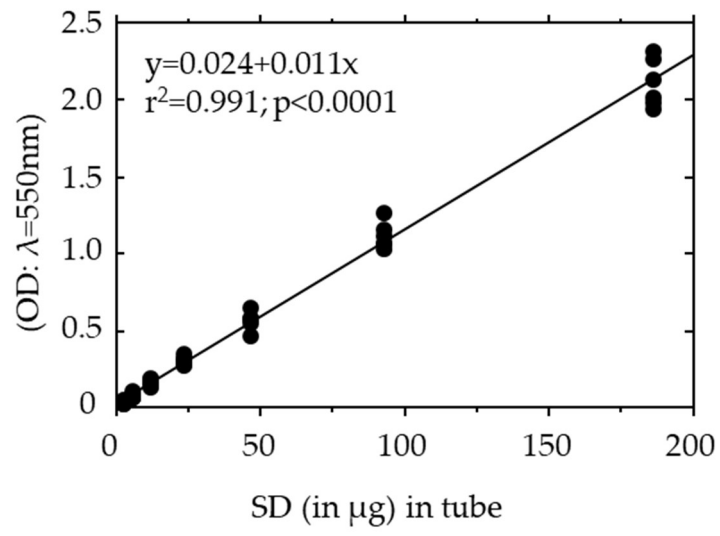

**Figure S2.** Standard curve of SD.

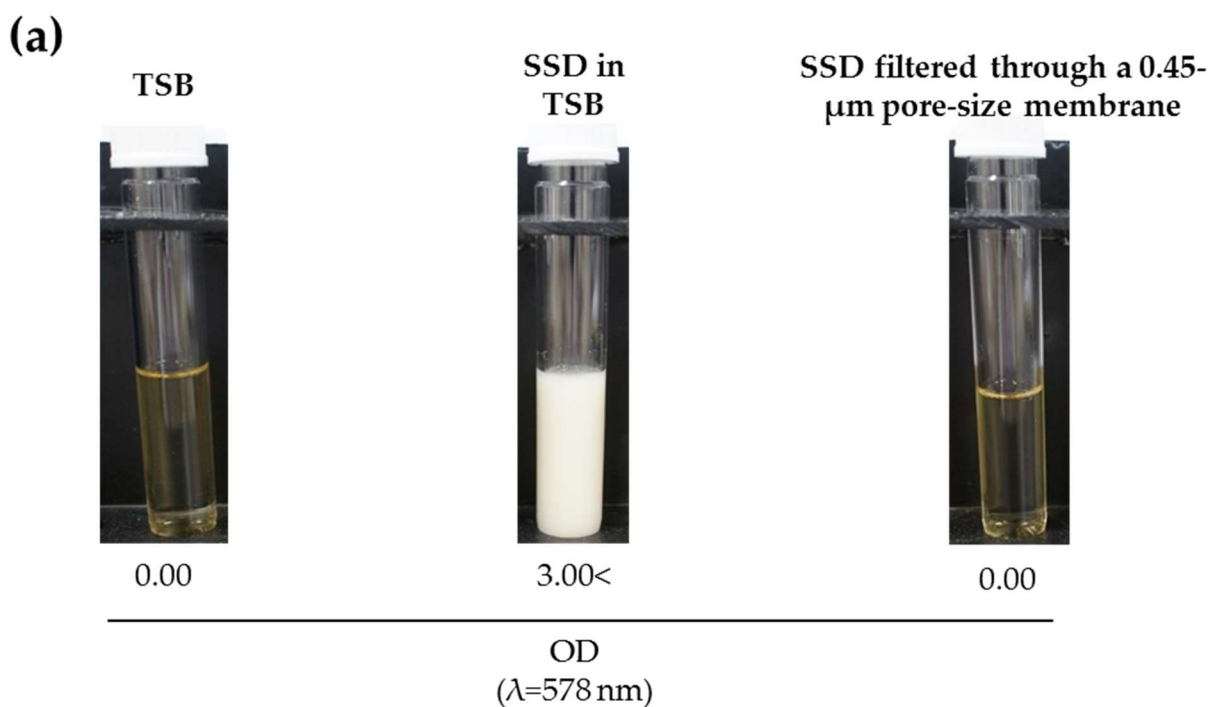

(b)

| Group             | Silver concentration ( $\mu\text{M}$ ) |                 |                 |                 |                 |                 |                  |                  |
|-------------------|----------------------------------------|-----------------|-----------------|-----------------|-----------------|-----------------|------------------|------------------|
|                   | 0                                      | 175             | 350             | 700             | 1400            | 2800            | 5600             | 11200            |
| AgNO <sub>3</sub> | 0                                      | 0.96 $\pm$ 0.14 | 3.02 $\pm$ 0.36 | 5.91 $\pm$ 0.28 | 7.14 $\pm$ 0.28 | 7.69 $\pm$ 0.28 | 10.03 $\pm$ 0.60 | 18.13 $\pm$ 0.48 |
| SSD (direct)      | 0                                      | 0.93 $\pm$ 0.20 | 2.27 $\pm$ 0.27 | 4.64 $\pm$ 0.31 | 5.77 $\pm$ 0.17 | 5.25 $\pm$ 0.31 | 6.10 $\pm$ 0.20  | 6.08 $\pm$ 0.39  |
| SSD (chambered)   | 0                                      | 0.73 $\pm$ 0.11 | 1.41 $\pm$ 0.32 | 1.83 $\pm$ 0.57 | 2.95 $\pm$ 0.56 | 5.23 $\pm$ 0.69 | 5.56 $\pm$ 0.64  | 6.12 $\pm$ 0.33  |

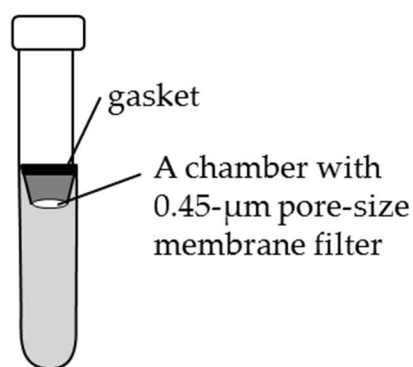

SSD (chambered)

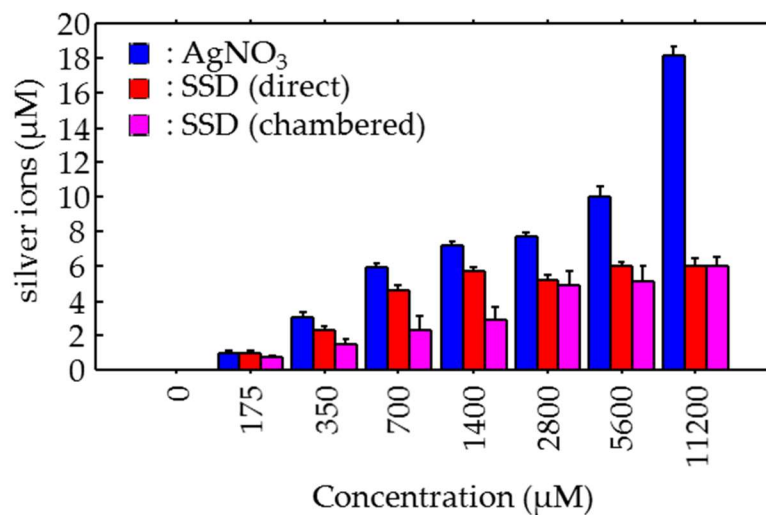

**Figure S3.** Filtered SSD and ionized silver concentration. (a): The cloudy solution of SSD solution became clear after filtration with a 0.45  $\mu\text{m}$ -pore membrane. (b): Ionized silver concentrations in TSB after 24 h incubation at 37°C with AgNO<sub>3</sub>, directly added SSD, and chambered SSD. Data are presented as mean  $\pm$  SE, N size = 3; number of experimental replicates = 2.
